# Supplementary material
Source: Springer Nature journal article supplement (https://www.springermedizin.de/resource/supplementary/13058_2012_2972_MOESM2_ESM.pdf/9703002)

**(a)**

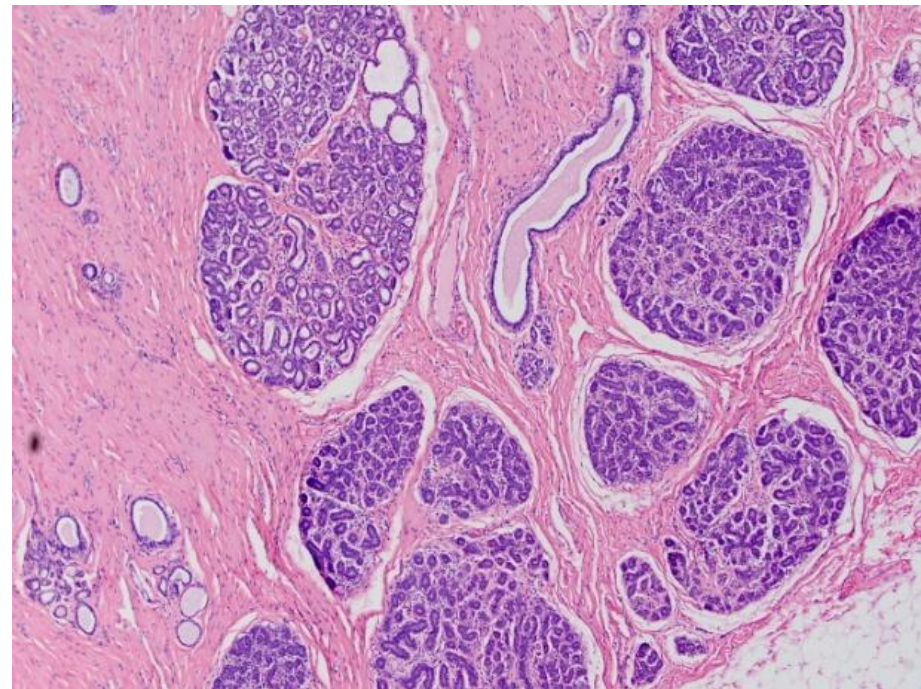

**(b)**

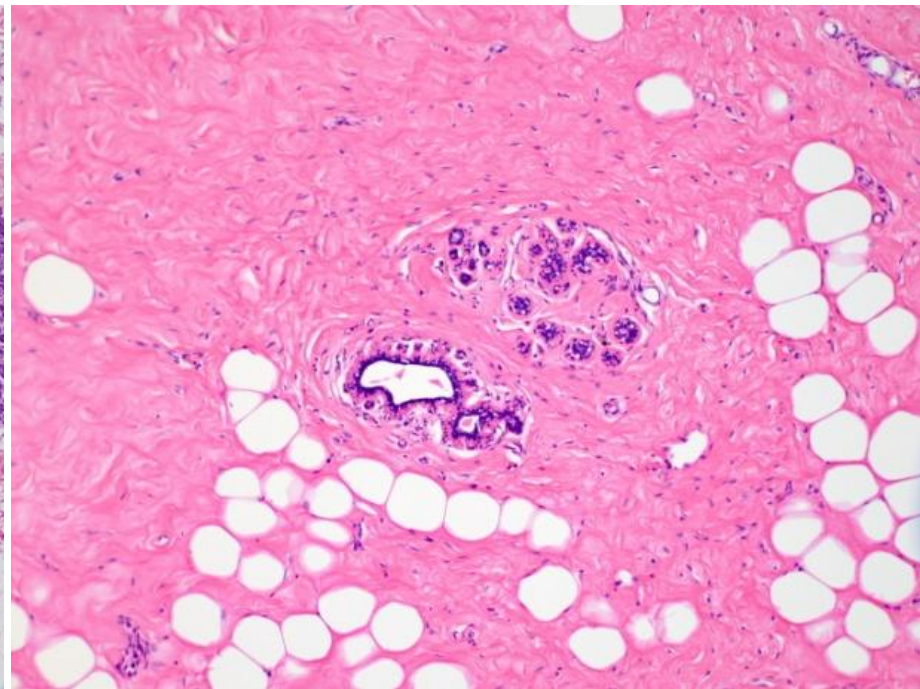

Supplement: MOESM2 [file 9703002]
